# Supplementary material for: Enzyme-mediated in situ formation of pH-sensitive nanogels for proteins delivery
Source: Royal Society of Chemistry journal article supplement (doi:10.1039/c5ra25133h), 2016-01-01
Supplement: c5ra25133h1.pdf [file c5ra25133h1.pdf]

## Electronic Supplementary Information

# Enzyme-mediated in situ formation of pH-sensitive nanogels for proteins delivery

Zhipeng Zeng,<sup>a</sup> Yingqi She,<sup>a</sup> Zhiping Peng,<sup>a\*</sup> Junchao Wei,<sup>b</sup> and Xiaohui He<sup>a</sup>

<sup>a</sup> School of Materials Science and Engineering, Nanchang University, Nanchang 330031, China.

<sup>b</sup> College of Chemistry, Nanchang University, Nanchang 330031, China.

\*Corresponding Author: [zzpeng@ncu.edu.cn](mailto:zzpeng@ncu.edu.cn)

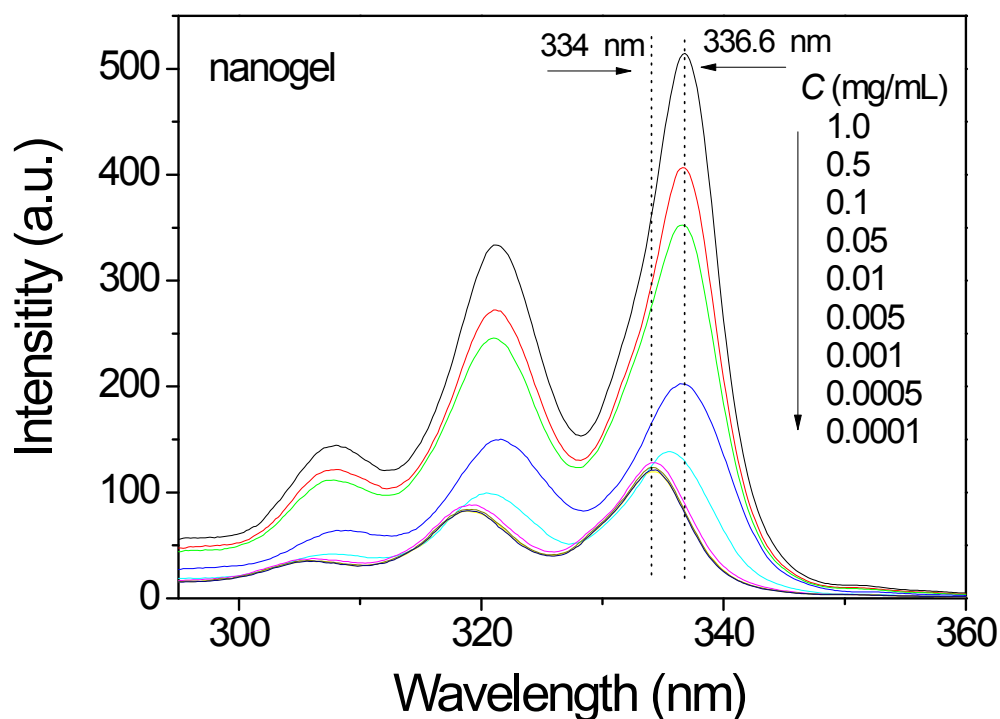

**Figure S1.** The fluorescence excitation spectra of pyrene (at an emission wavelength of 394 nm) in nanogel solutions at indicated polymer concentrations

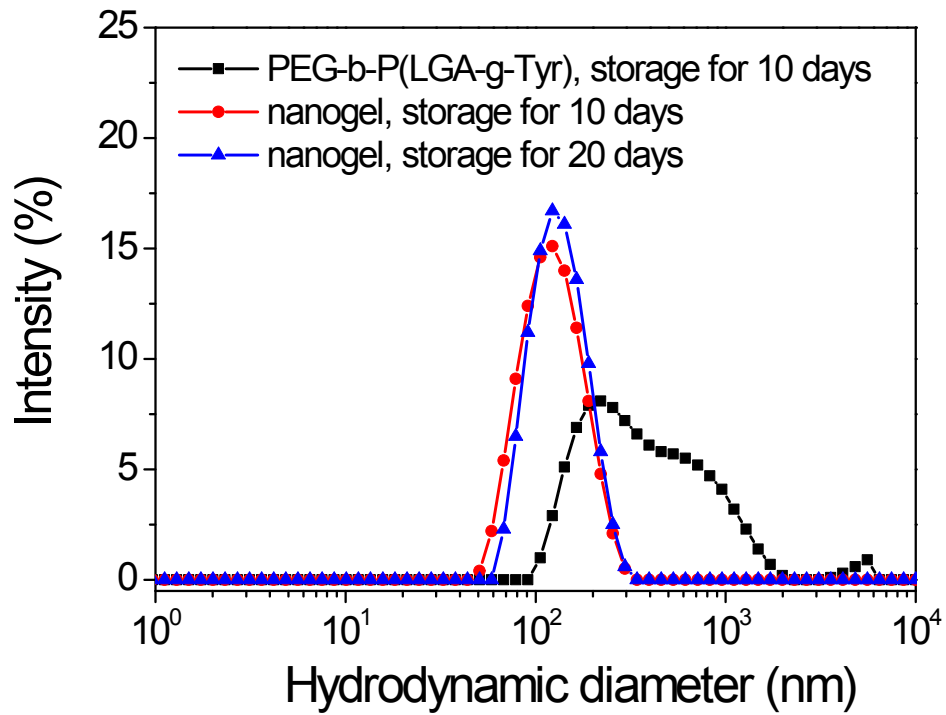

**Figure S2.** Size distribution of PEG-*b*-P(LGA-*g*-Tyr) copolymer micelles and nanogels (1 mg/mL) in PBS (pH7.4) storage at 37°C for indicated days

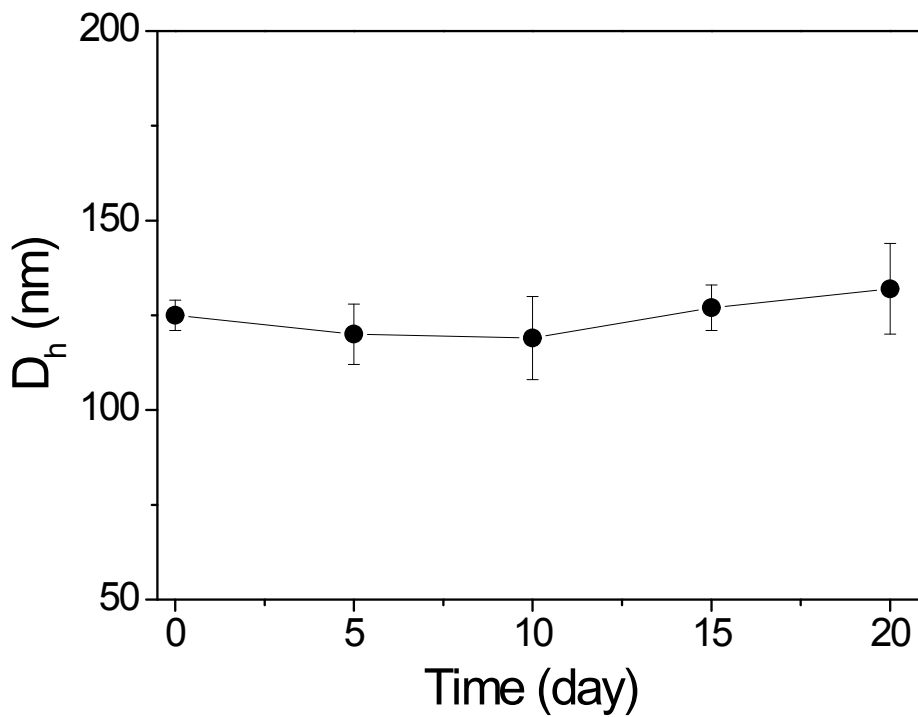

**Figure S3.** Stability of nanogels (1 g/L) in PBS (pH7.4) during storage. Data represent the average of triplicates.

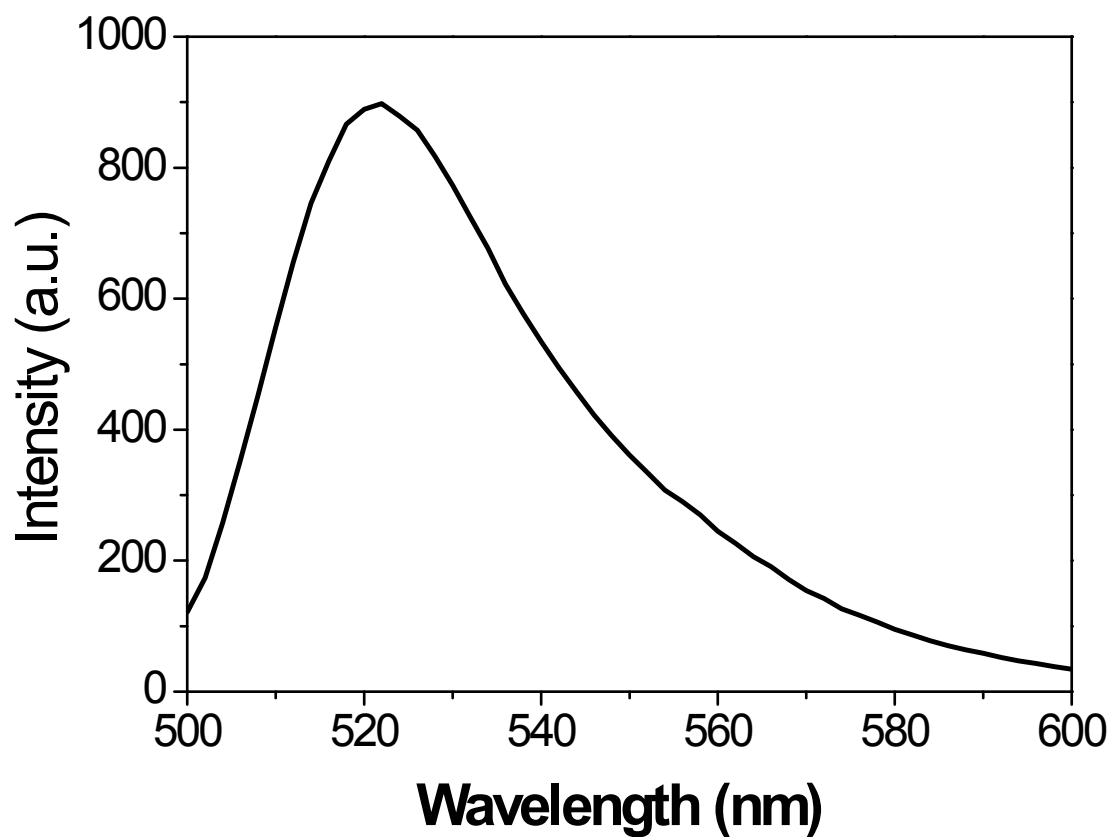

Figure S4. Fluorescence spectra of FITC-BSA in PBS (pH 7.4)

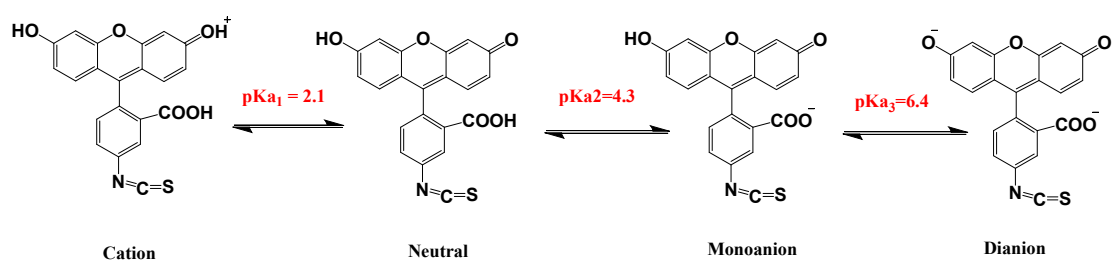

Figure S5. Different prototropic forms of FITC
